# Supplementary material for: Predicting electrocardiogram interpretation performance in Advanced Cardiovascular Life Support simulation: comparing knowledge tests and simulation performance among Mexican medical students
Source: PeerJ. 2019 Mar 15;7:e6632. doi: 10.7717/peerj.6632 (PMC6422014; doi:10.7717/peerj.6632)
Supplement: Supplemental Information 1 — Rows list each participant and columns list the variables. The ECG knowledge tests and the pre- and post-ACLS tasks (0 for wrong/unsuccessful, 1 for correct/successful). Rows 1 and 2 contain identifying headers. [file peerj-07-6632-s001.xls]

## Sheet: Sheet1
		ECG	ECG	ECG	ECG	ECG	ACLS PRE	ACLS PRE	ACLS PRE	ACLS PRE	ACLS POST	ACLS POST	ACLS POST	ACLS POST
Year	Semester	ventricular tachycardia	Asystole	Supraventricular Tachycardia	Ventricular Fibrillation	Sinus bradycardia	Abnormal Heart Rate PRE	Ventricular tachicardias PRE	No Pulse PRE	Overall ACLS PRE	Abnormal Heart Rate PRE	Ventricular tachicardias PRE	No Pulse PRE	Overall ACLS POST
2016	Autumn	0	1	1	0	1	0	0	0	0.08	1	1	1	0.78
2016	Autumn	1	0	0	0	0	0	0	0	0.08	0	1	1	0.7
2016	Autumn	0	1	0	1	1	0	0	0	0.04	0	1	0	0.48
2016	Autumn	0	1	1	1	1	0	0	0	0.08	1	1	1	0.7
2016	Autumn	0	1	1	1	0	0	0	0	0.04	1	1	1	0.61
2016	Autumn	0	0	0	1	1	0	0	0	0.04	1	1	0	0.7
2016	Autumn	0	1	1	0	0	0	0	0	0.13	0	0	0	0.65
2016	Autumn	1	1	0	0		0	0	0	0	1	1	0	0.52
2016	Autumn	0	1	1	0	0	0	0	0	0	1	1	0	0.74
2016	Autumn	0	1	0	0	1	0	0	0	0.21	1	1	1	0.74
2016	Autumn	0	1			1	0	0	0	0	1	1	1	0.74
2016	Autumn	0	1	0	0	0	0	0	0	0.04	0	1	1	0.83
2016	Autumn	0	1	1	1	1	0	0	0	0.13	1	1	1	0.83
2016	Autumn	0	0	1	0	1	0	0	0	0.04	1	1	0	0.57
2017	Spring	0	0	0	1	1	0	0	0	0.08	1	1	0	0.57
2017	Spring	1	1	1	0	1	0	0	0	0.08	1	1	0	0.43
2017	Spring	0	1	1	1	1	0	0	0	0.08	1	1	0	0.52
2017	Spring	1	1	0	1		0	0	0	0.08	1	1	1	0.65
2017	Spring	0	1	1	1		0	0	0	0	1	1	0	0.57
2017	Spring	0	1	0	1	1	0	0	0	0	0	1	0	0.52
2017	Spring			1	0	0	0	0	0	0	0	0	0	0.26
2017	Spring					0	0	0	0	0	1	1	1	0.52
2017	Spring	0	0	1	1	0	0	0	0	0	1	1	1	0.61
2017	Spring	0	1	1	1	1	0	0	0	0.08	1	1	1	0.57
2017	Spring	0	0	0	0	0	0	0	0	0.08	1	1	0	0.65
2017	Spring	0	1	1	1	1	0	0	0	0.17	0	1	1	0.7
2017	Spring	0	1	1	0	0	0	0	0	0.17	0	0	1	0.52
2017	Spring	1	0	1	1	1	0	0	0	0.17	1	1	1	0.65
2017	Spring	0	0	1	1	1	0	0	0	0.17	1	1	1	0.7
2017	Spring			0	1	1	0	0	0	0.08	1	1	0	0.61
2017	Spring	0	1	1	1	1	0	0	0	0.08	0	0	0	0.48
2017	Spring	1	1	1	1	1	0	0	0	0.17	1	1	0	0.57
2017	Spring	0	1	0	0	1	0	0	0	0	1	0	0	0.39
2017	Spring	0	1	1	1	0	0	0	0	0.17	0	1	1	0.48
2017	Spring	1	1	1	1	1	0	0	0	0.17	0	1	0	0.65
2017	Spring	1	0	1	1	1	0	0	0	0.08	1	1	0	0.65
2017	Spring	1	1	0	1	0	0	0	0	0	1	1	1	0.78
2017	Spring	1	1	1	1	1	0	0	0	0	1	1	1	0.83
2017	Spring	1	1	0	1		0	0	0	0.17	1	1	1	0.7
2017	Spring	0	1	1	0	0	0	0	0	0	1	1	1	0.83
2017	Spring			1	1	0	0	0	0	0.17	1	1	0	0.61
2017	Spring	1	0	1	1	0	0	0	0	0	0	1	1	0.57
